# Supplementary material for: Distinct positions of genetic and oral histories: Perspectives from India
Source: PubMed Central journal article supplement — HGG Adv. 2024 May 8;5(3):100305. doi: 10.1016/j.xhgg.2024.100305 (PMC11153255; doi:10.1016/j.xhgg.2024.100305), 2024-05-08
Supplement: mmc1.pdf [file mmc1.pdf]

**HGGA, Volume 5**

## **Supplemental information**

### **Distinct positions of genetic and oral**

#### **histories: Perspectives from India**

**Arjun Biddanda, Esha Bandyopadhyay, Constanza de la Fuente Castro, David Witonsky, Jose A. Urban Aragon, Nagarjuna Pasupuleti, Hannah M. Moots, Renée Fonseca, Suzanne Freilich, Jovan Stanisavic, Tabitha Willis, Anoushka Menon, Mohammed S. Mustak, Chinnappa Dilip Kodira, Anjaparavanda P. Naren, Mithun Sikdar, Niraj Rai, and Maanasa Raghavan**

|             |                                                                                                                                | Page Number |
|-------------|--------------------------------------------------------------------------------------------------------------------------------|-------------|
| Fig. S1     | $f_4$ ratio model.                                                                                                             | 1           |
| Fig. S2     | D-statistics for the $f_4$ ratio test.                                                                                         | 2           |
| Fig. S3     | Pairwise qpWave analysis.                                                                                                      | 3           |
| Fig. S4     | PCA with pseudo-haploid calls.                                                                                                 | 4           |
| Fig. S5A    | Extended ADMIXTURE results across K=6 to K=11.                                                                                 | 5           |
| Fig. S5B    | Cross-validation error of ADMIXTURE from K=6 to K=11, minimized in K=7.                                                        | 5           |
| Fig. S6     | ADMIXTURE with pseudo-haploid calls.                                                                                           | 6           |
| Fig. S7A    | PCA investigating genetic variation in Kapla.                                                                                  | 7           |
| Fig. S7B    | PCA to investigate the genetic relationship between Kapla and Siddi populations.                                               | 7           |
| Fig. S8     | Outgroup- $f_3$ of the form $f_3(\text{Target}, X; \text{Mbuti})$ .                                                            | 8           |
| Fig. S9     | Outgroup- $f_3$ of the form $f_3(\text{Target}, X; \text{Mbuti})$ using pseudo-haploid calls.                                  | 9           |
| Fig. S10A-K | Treemix results.                                                                                                               | 10-13       |
| Fig. S11    | $f_4$ -ratio results.                                                                                                          | 14          |
| Fig. S12    | D-statistic with source populations from qpAdm model.                                                                          | 15          |
| Fig. S13    | D-statistic with source populations from qpAdm model using pseudo-haploid calls.                                               | 16          |
| Fig. S14    | Summary of co-ancestry matrix as average length count per population from ChromoPainter.                                       | 17          |
| Fig. S15    | fineSTRUCTURE clustering dendrogram.                                                                                           | 18          |
| Fig. S16    | Ancestry-specific haplotype copying across sampled populations from Southwest India.                                           | 19          |
| Fig. S17    | Total length of ROH (SROH) versus the total number of ROH (NROH).                                                              | 20          |
| Fig. S18    | Short versus long ROH for select populations.                                                                                  | 21          |
| Fig. S19    | Decay curves for the Southwest India populations (Kapla, Bunt, Kodava, Kodava US, and Nair) and other South Asian populations. | 22          |
| Fig. S20A-B | Functional and novel variation in high-coverage WGS samples from Southwest India.                                              | 23          |
| Table S2    | Populations included in Treemix analysis.                                                                                      | 24          |
| Table S4    | Populations used for calculating PCA-based SNP-loadings.                                                                       | 25-26       |
| Table S10   | Allele sharing of Paniya and Kapla_A/Kapla_B/Kapla with ancient and present-day African groups using D-statistics.             | 27-28       |
| Table S11   | ANI-ASI admixture timings in select populations from India inferred using ALDER (fit started at $d > 0.30$ cM).                | 29-30       |
| Table S15   | Haplotype and nucleotide diversity on mtDNA across matrilineal and patrilineal groups in Southwest India.                      | 31          |

**Figure S1:  $f_4$  ratio model.** Representation of the model used for estimating the relative proportions of ANI- and ASI-related genetic ancestries in the Southwest Indian populations.

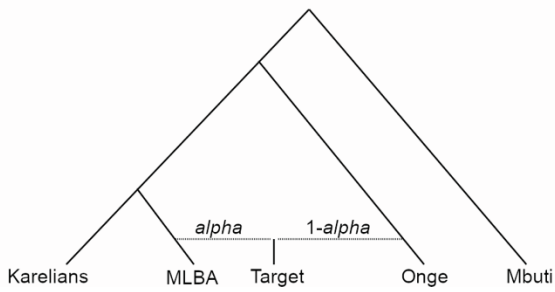

**Figure S2: D-statistics for the  $f_4$  ratio test.** D-statistics to evaluate the closest present-day population to Central Steppe MLBA (ANI proxy) for estimating  $\alpha$ .

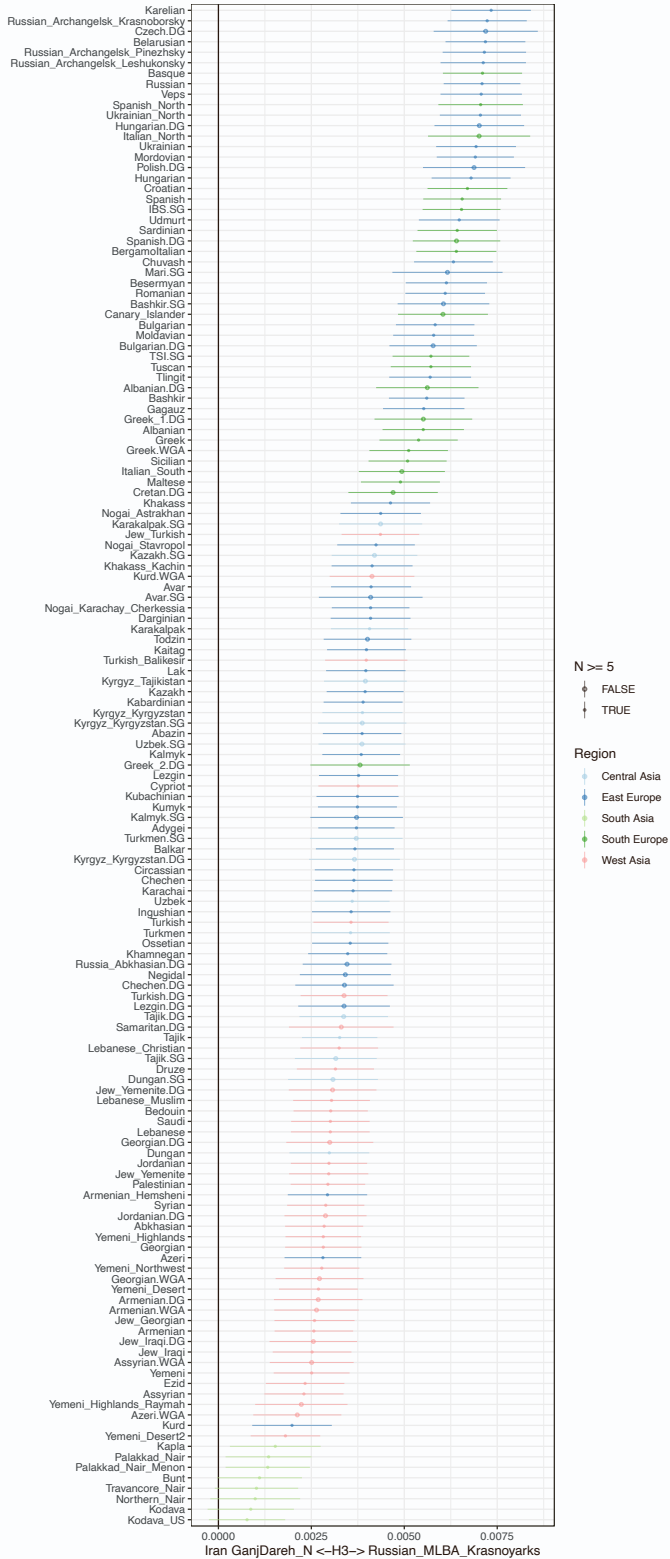

**Figure S3: Pairwise qpWave analysis to test for cladality of source populations with respect to the outgroups.** This test was run using ADMIXTOOLS2 (*maxmiss* 0.2) and implemented to evaluate if outgroups were able to differentiate source populations. Outgroup populations contribute to the differentiation of the pair when p-values are lower than 0.05.

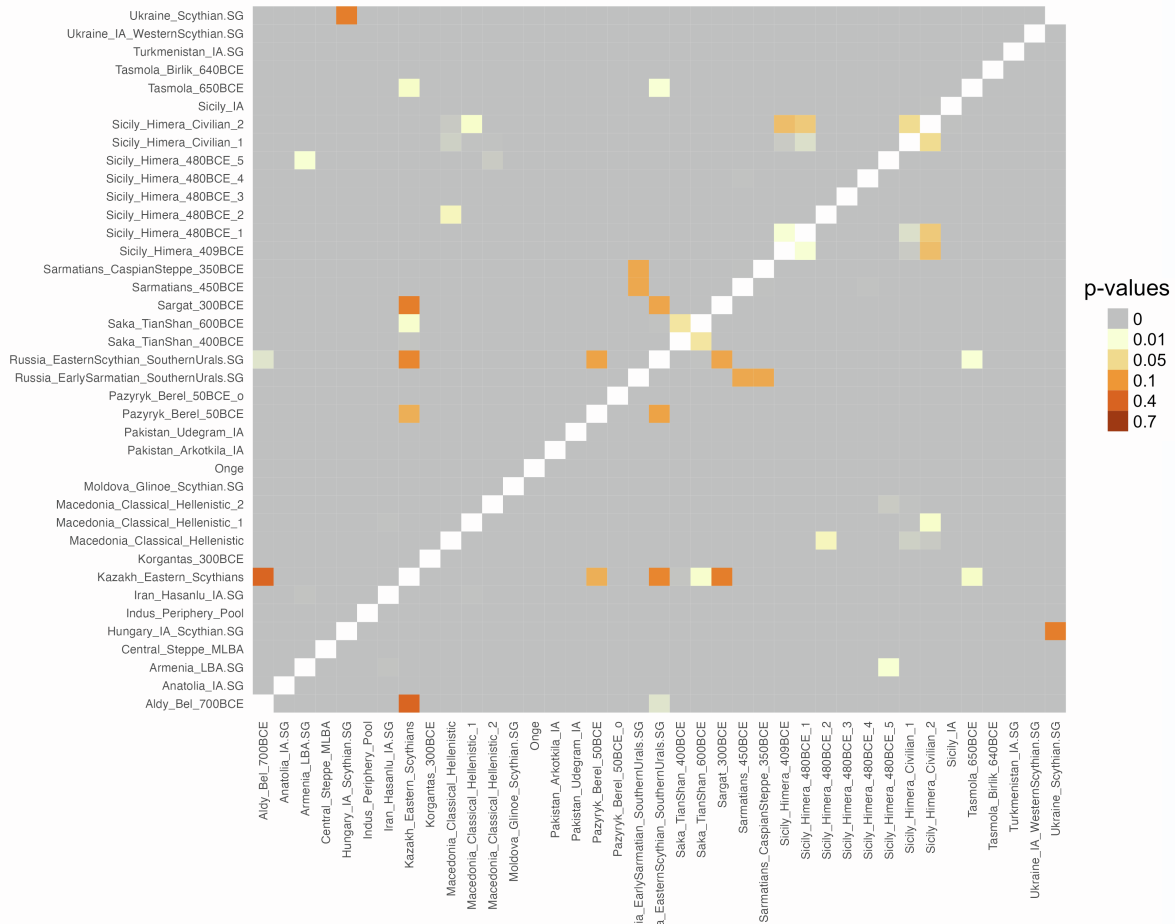

Figure S4: PCA with pseudo-haploid calls.

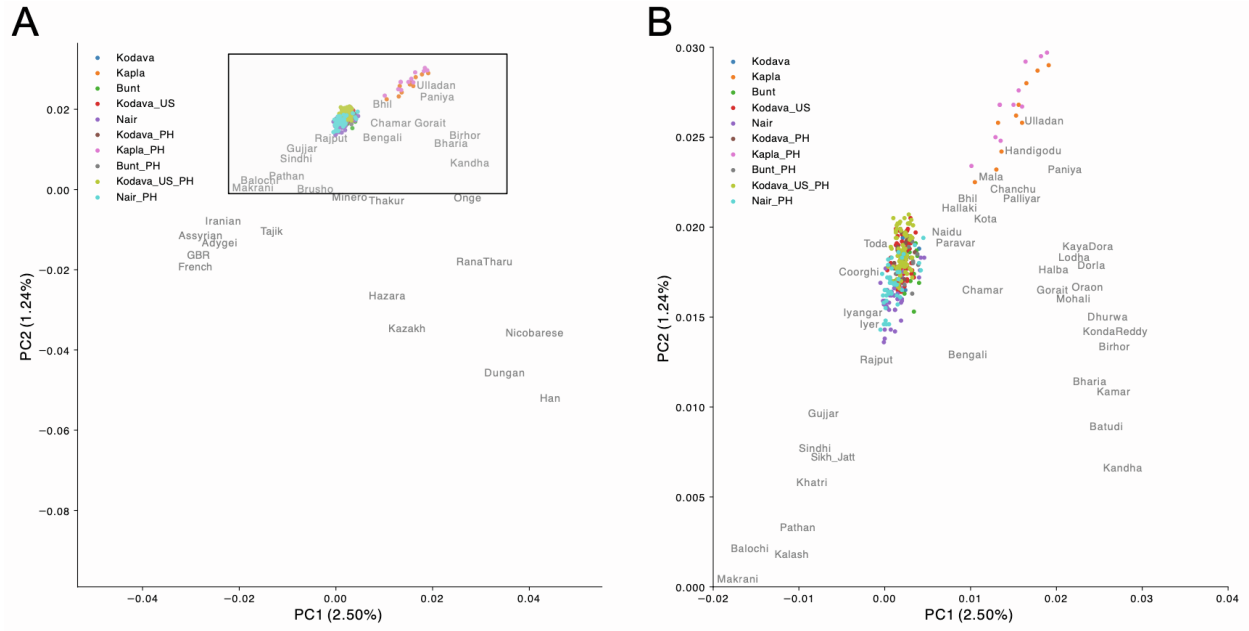







**Figure S7A: PCA investigating genetic variation in Kapla.** Dispersion of the eight Kapla individuals along the ANI-ASI cline with respect to other select South Indian populations with higher ASI component like the Ulladan, Paniya and Vysya. For comparison, Gujjar is shown as a representative of a population with higher ANI component.

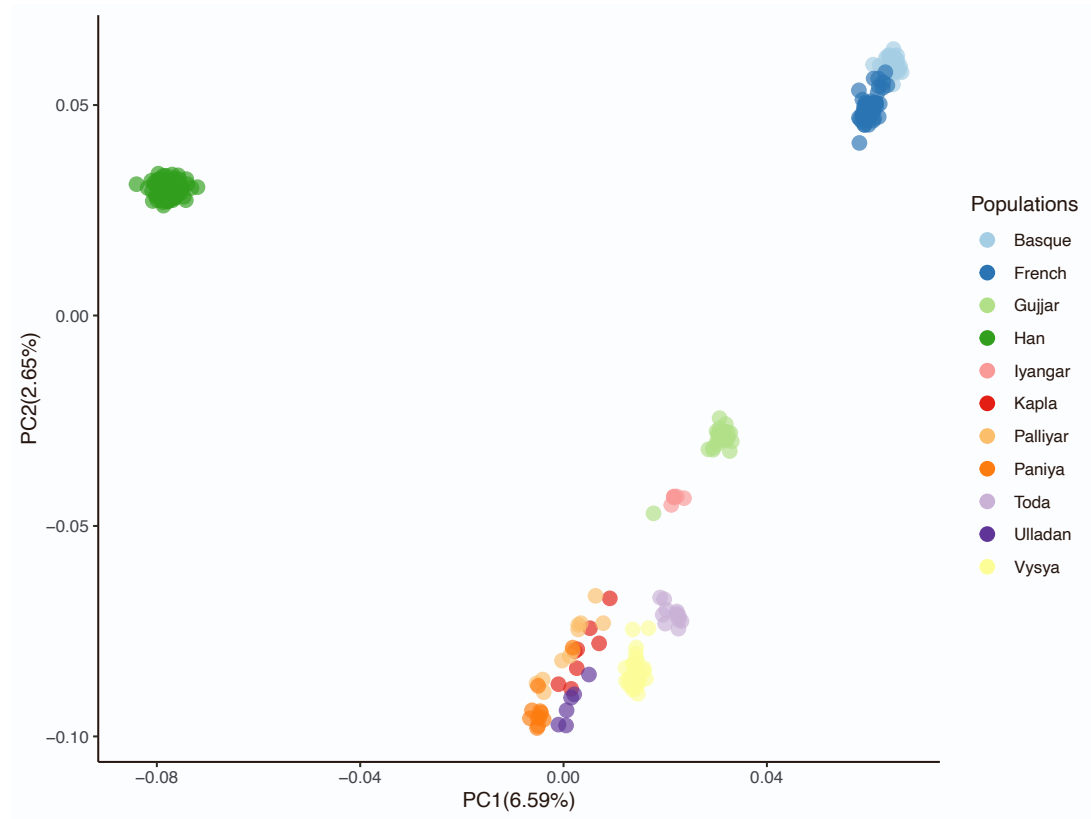

**Figure S7B: PCA to investigate the genetic relationship between Kapla and Siddi/African populations.**

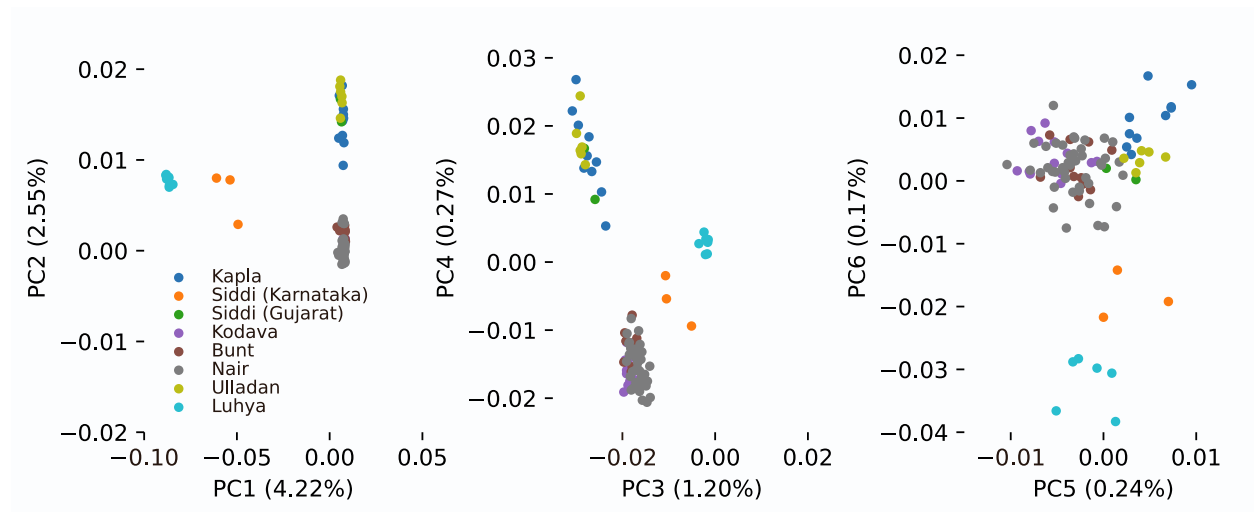

**Figure S8: Outgroup- $f_3$  statistic of the form  $f_3(\text{Target}, \mathbf{X}; \text{Mbuti})$ .** Target corresponds to one of the Southwest Indian populations sequenced in this study and  $\mathbf{X}$  to a set of Eurasian populations from the dataset described in Methods.

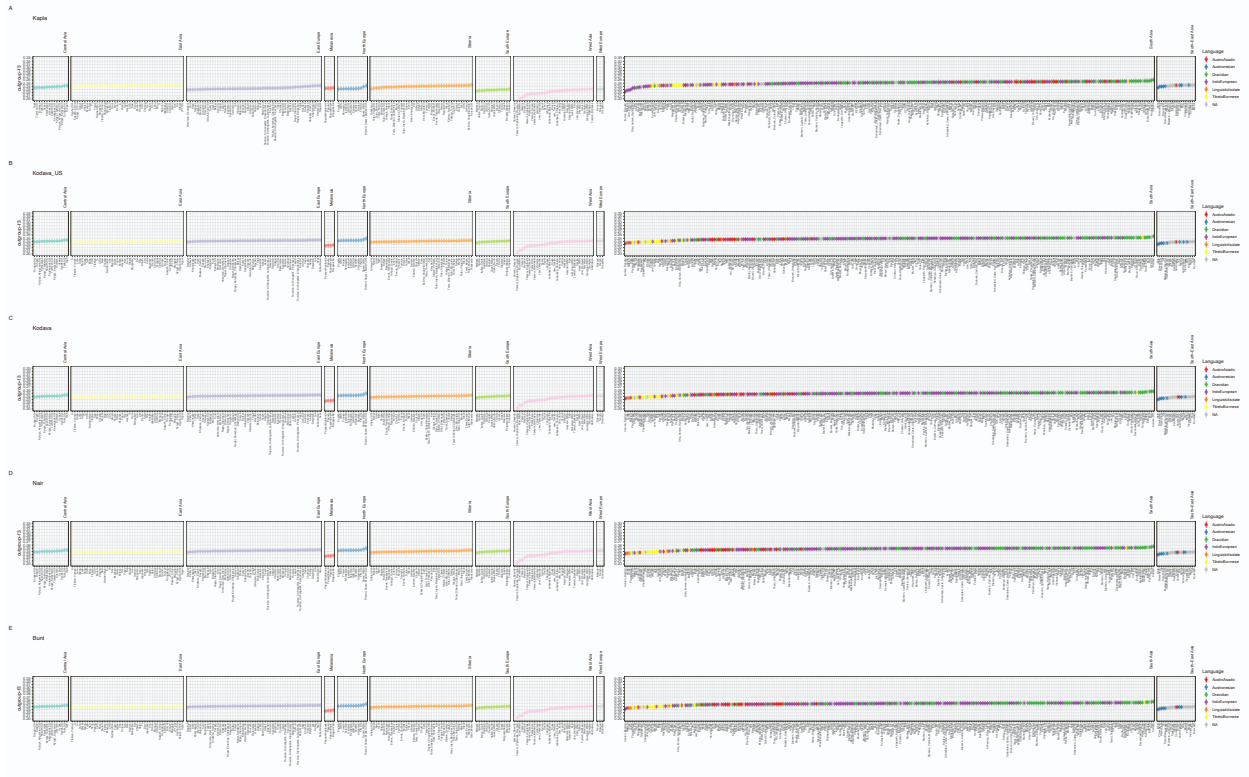

**Figure S9: Outgroup- $f_3$  statistic of the form  $f_3(\text{Target}, X; \text{Mbuti})$  using pseudo-haploid calls.** Target corresponds to one of the Southwest Indian populations sequenced in this study and X to a set of Eurasian populations from the dataset described in Methods.

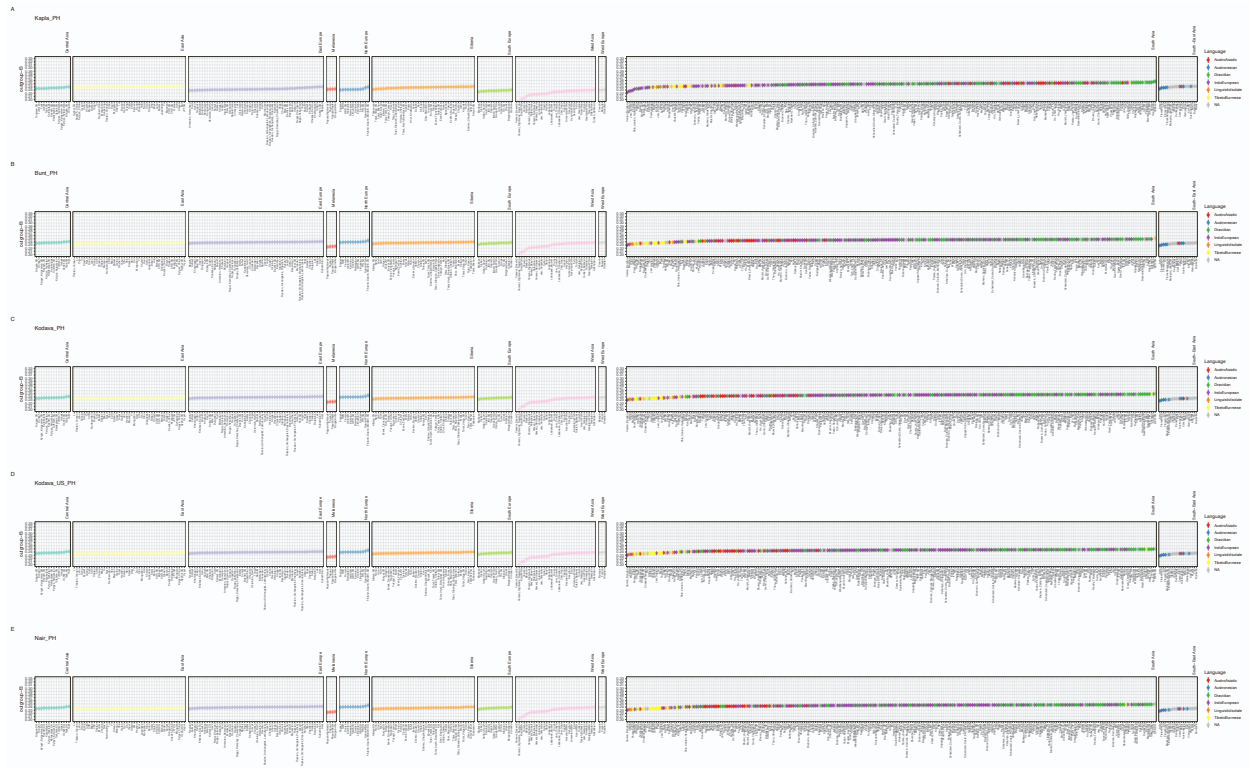

**Figure S10A-K: Treemix results.** Maximum Likelihood trees (left panel) and residuals (right panel) of allele frequency estimates from Treemix with up to 10 migration edges (m).

A)  $m=0$

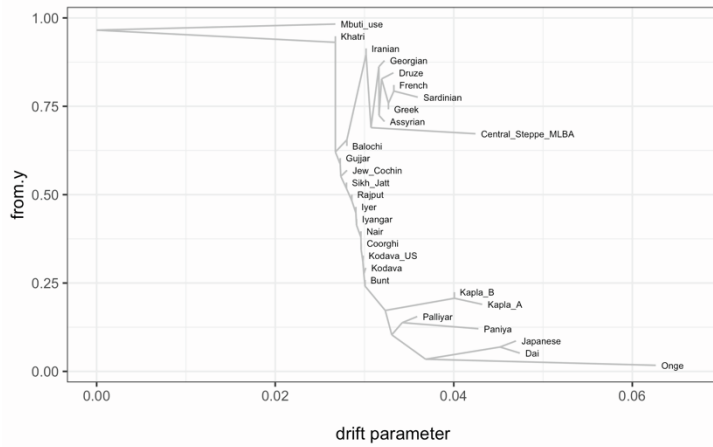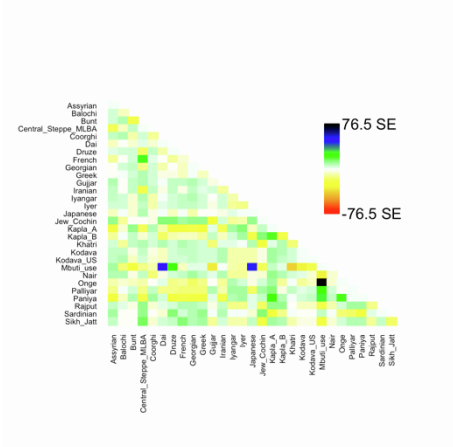

B)  $m=1$

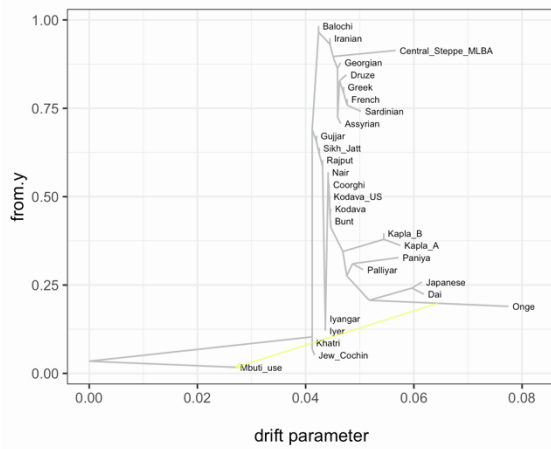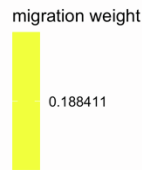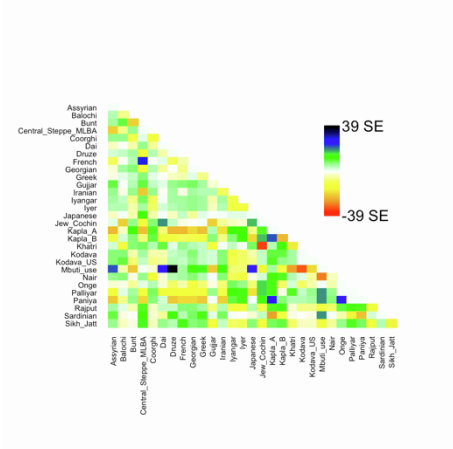

C)  $m=2$

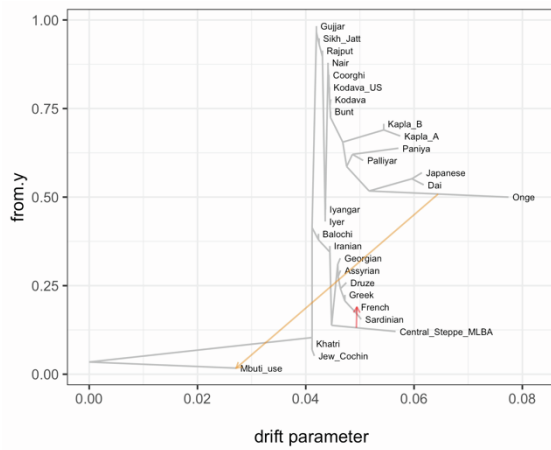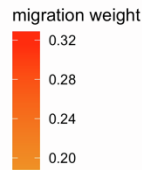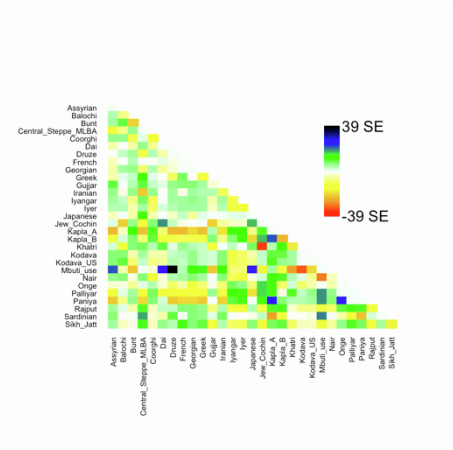

D)  $m=3$

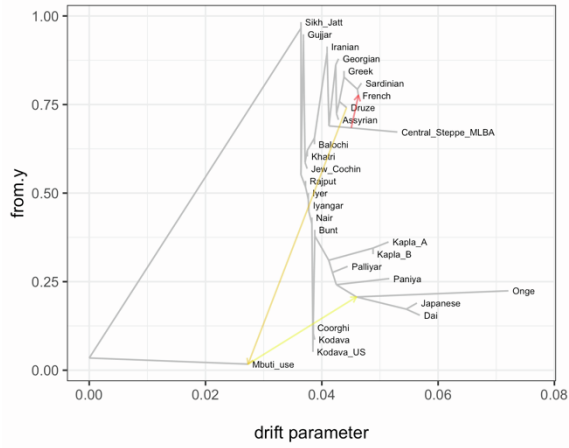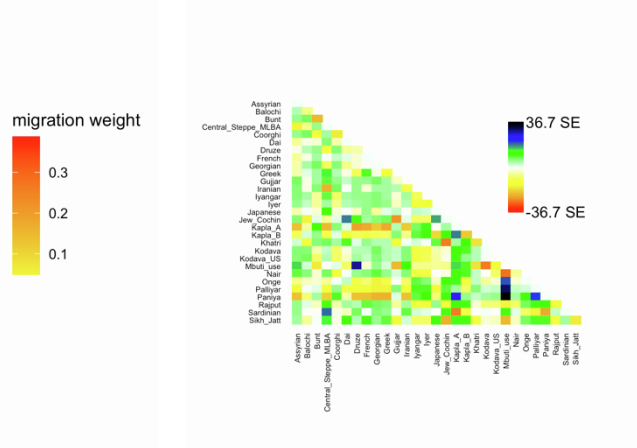

E)  $m=4$

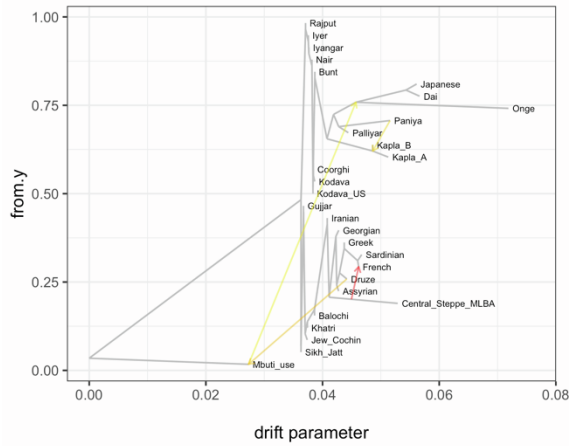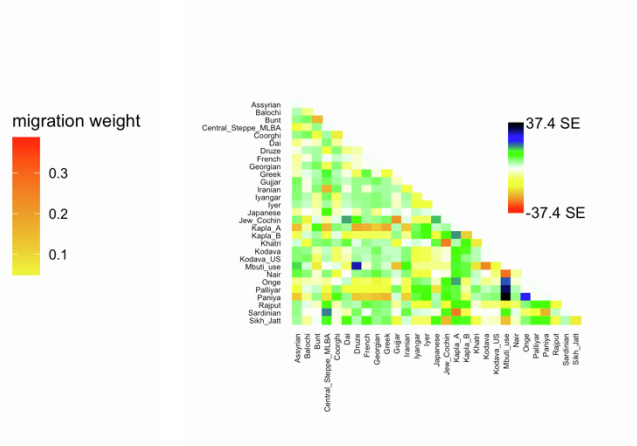

F)  $m=5$

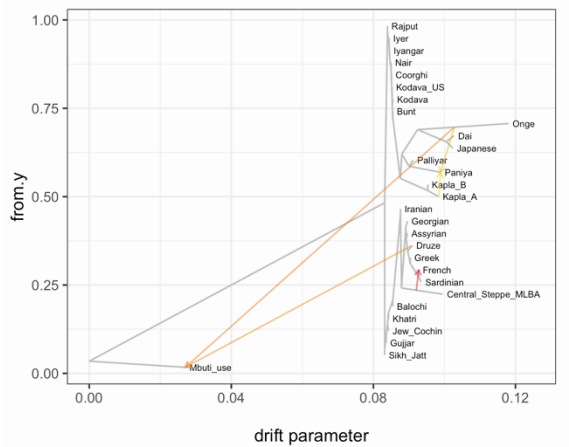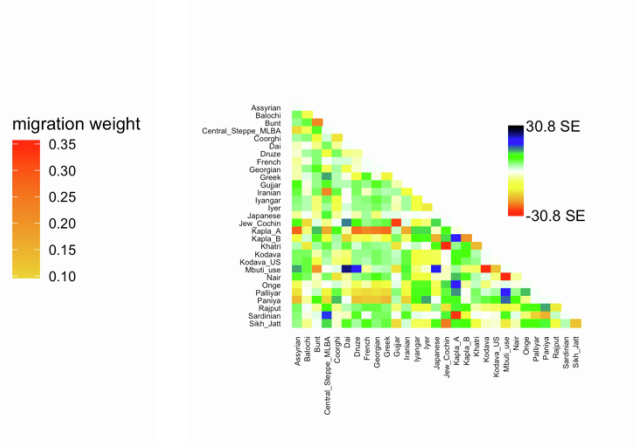

G) m=6

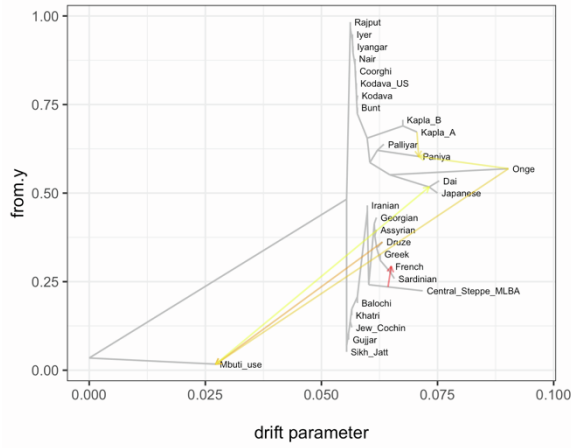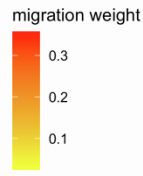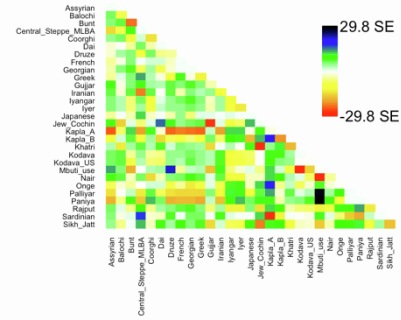

H) m=7

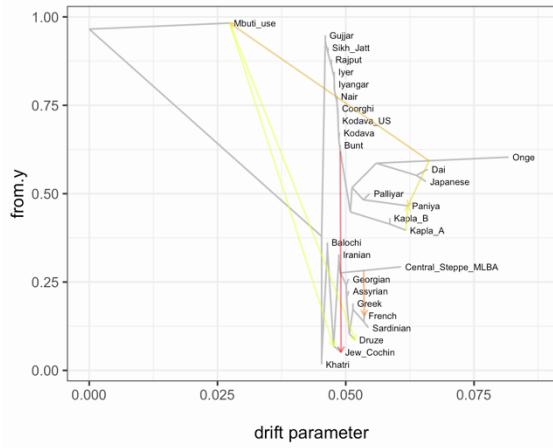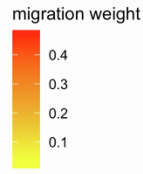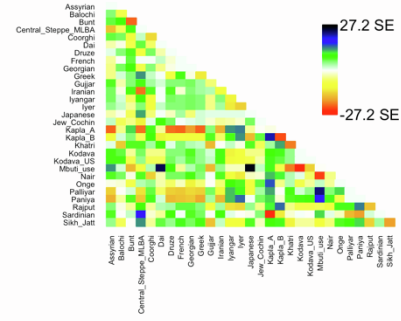

I) m=8

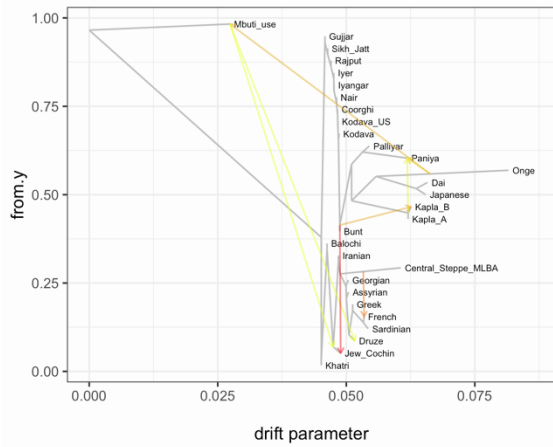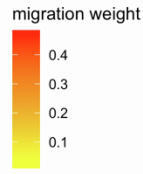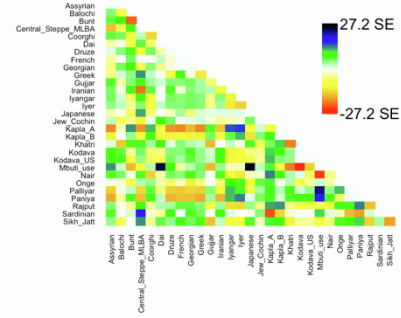

J)  $m=9$

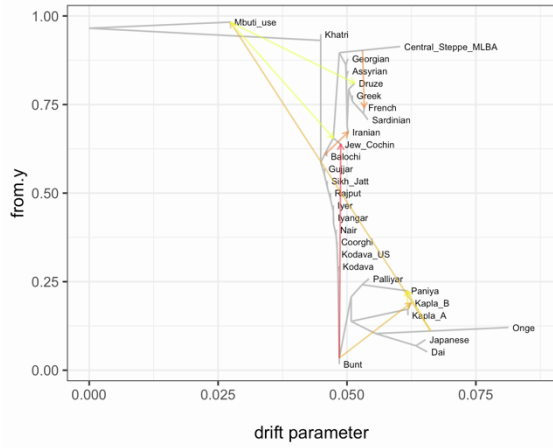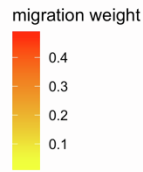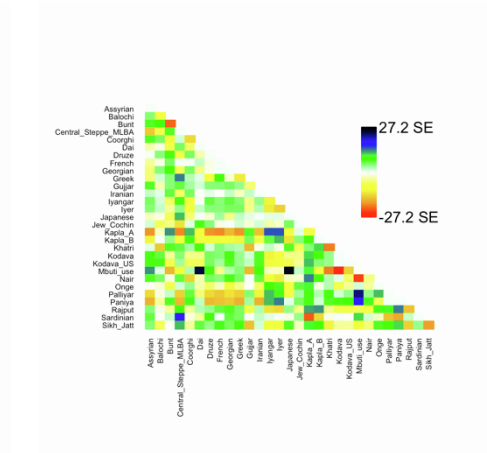

K)  $m=10$

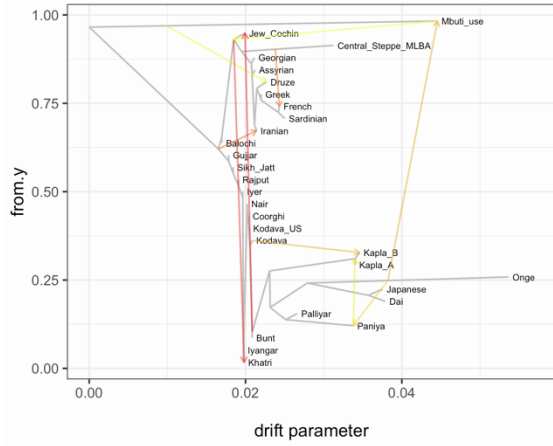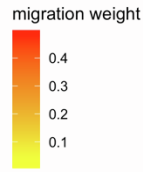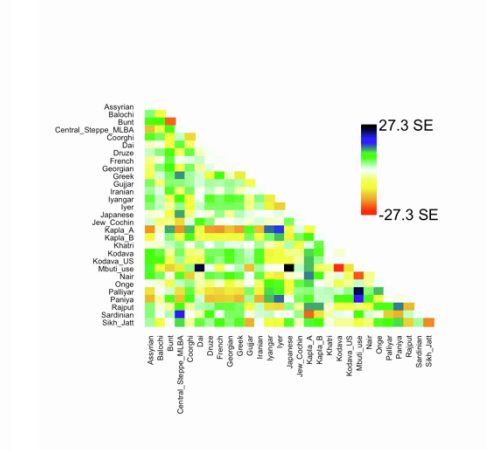

**Figure S11:  $f_4$  ratio results.** Estimation of the proportion of ANI-related genetic ancestry in South Asians using Central Steppe MLBA (a).

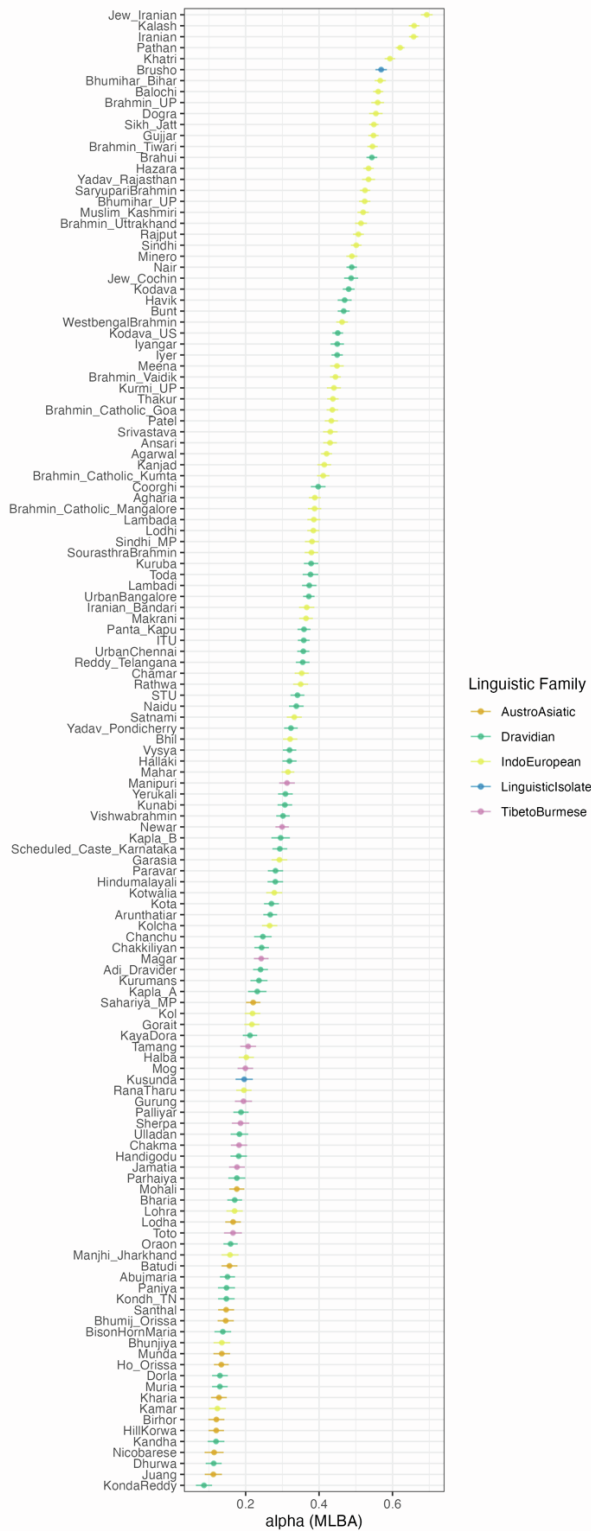





**Figure S13: D-statistic with source populations from qpAdm model using pseudo-haploid calls. D-statistic of the form  $D(\text{South Asia, H2; Source; Mbuti})$ , where H2 is one of the study populations and Source is one of Central Steppe MLBA (A), Indus Periphery (B) or Onge (C).**

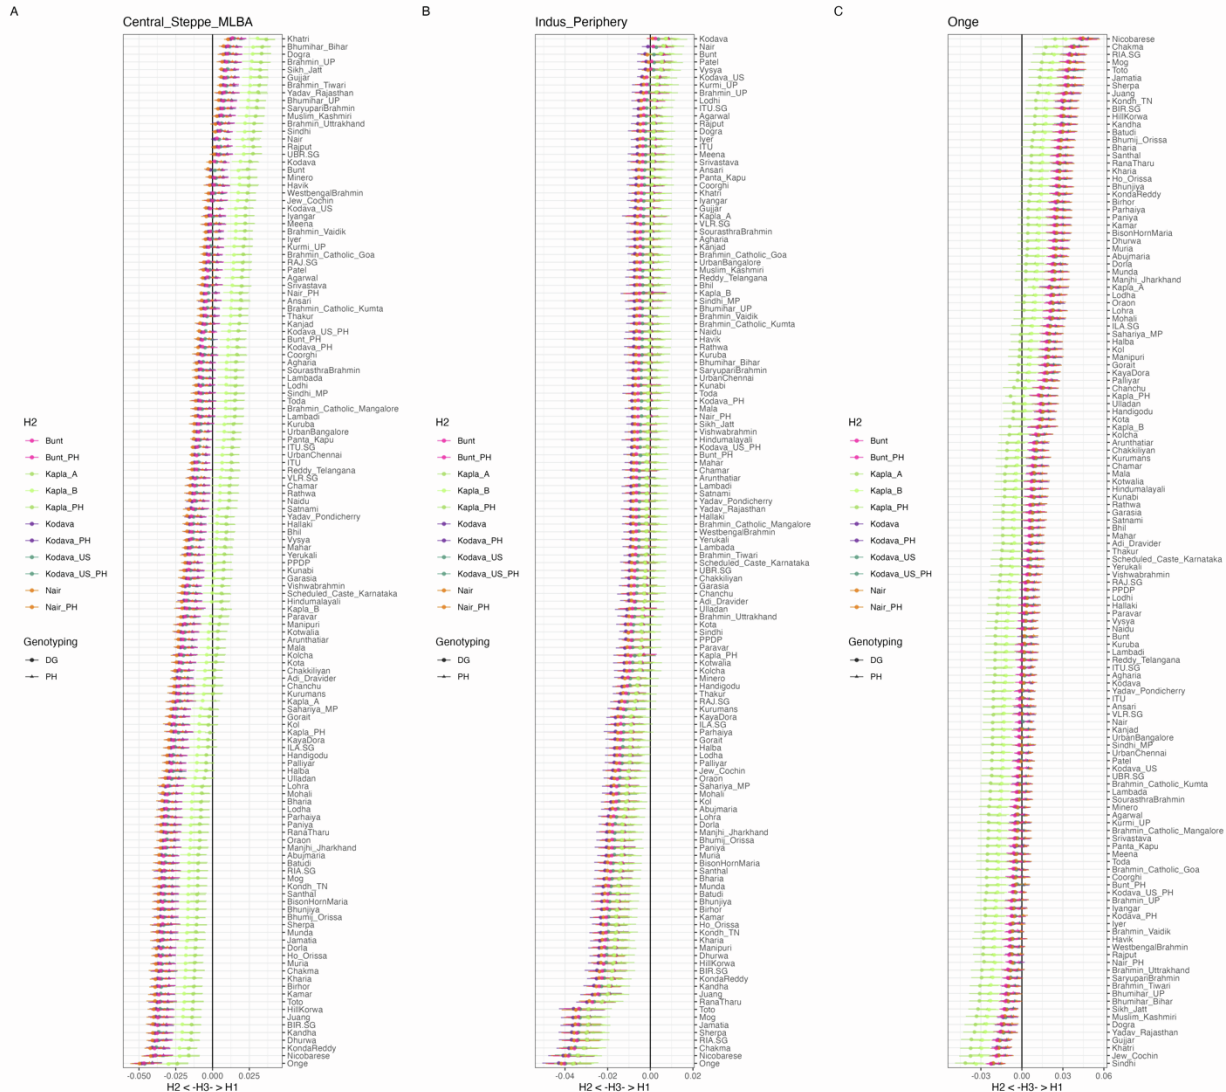

**Figure S14: Summary of co-ancestry matrix as average length count per population from ChromoPainter.**

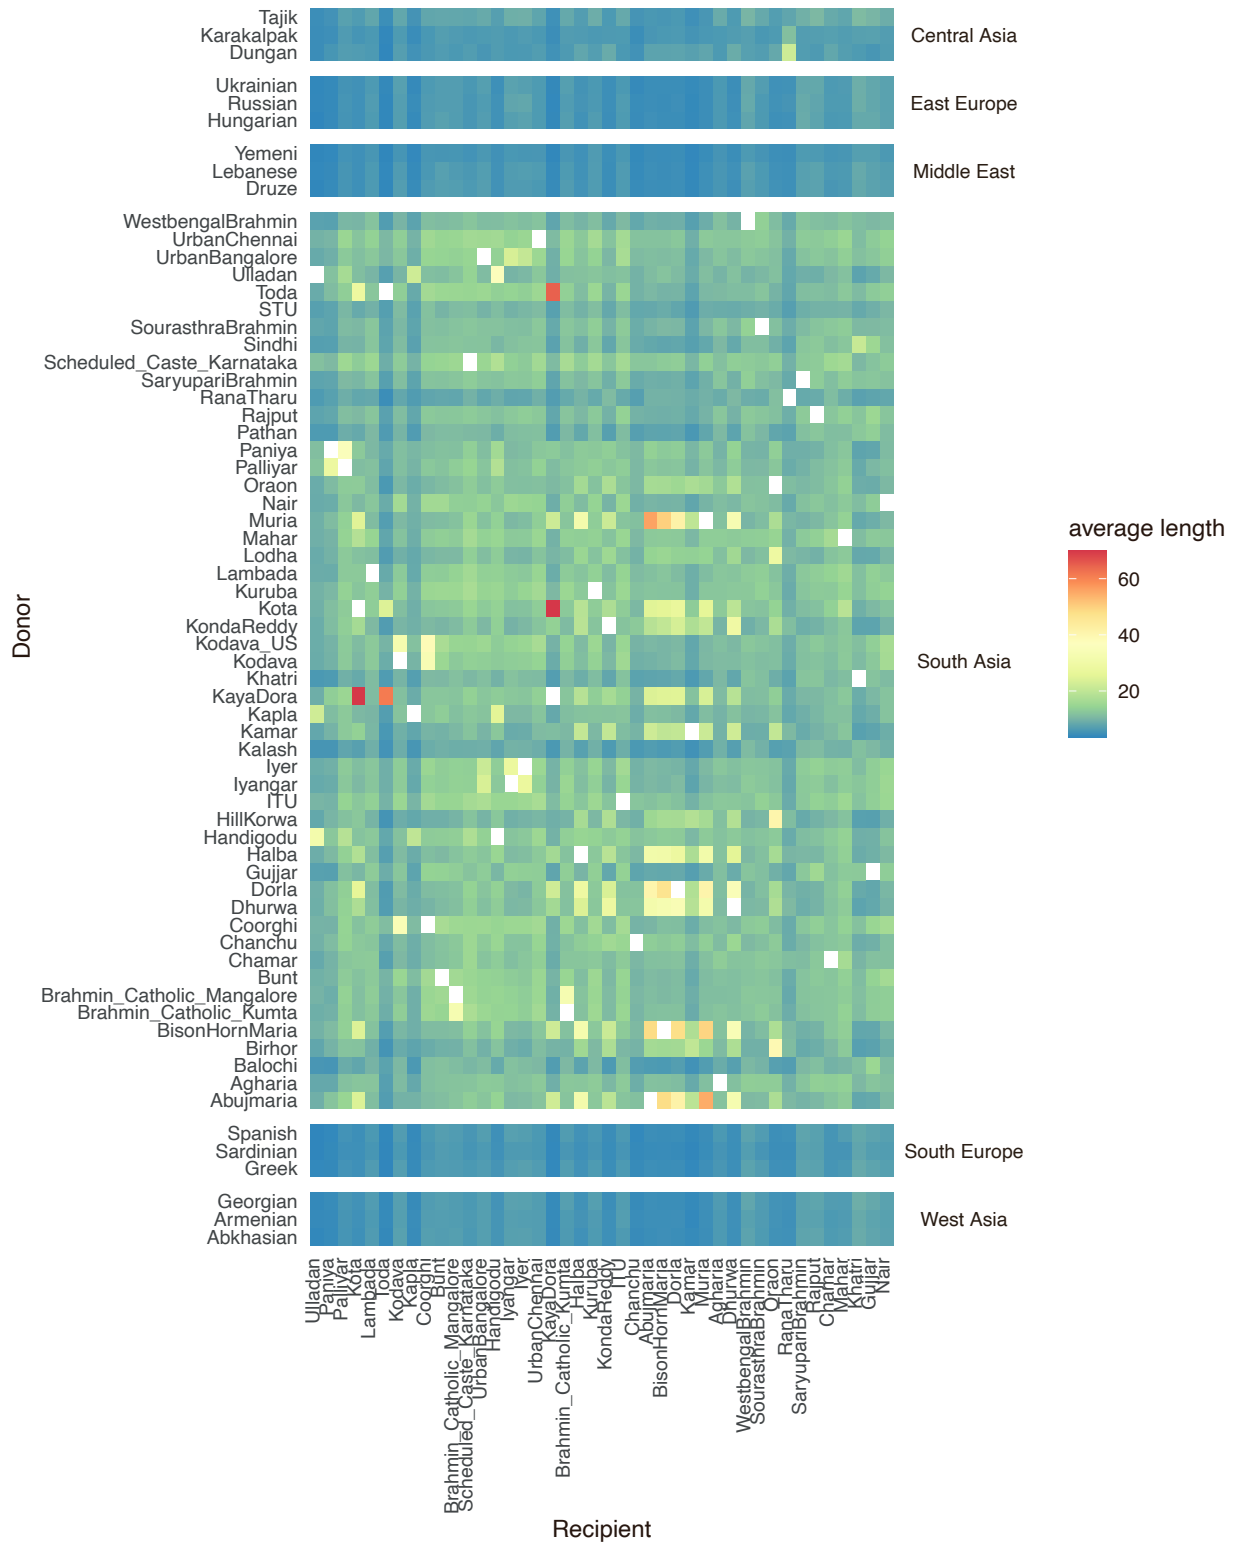



**Figure S16: Ancestry-specific haplotype copying across sampled populations from Southwest India.** The median per-locus copying probability from ChromoPainter represents the haplotype-level similarity between individuals from the focal populations from India – Rajput and Paniya added to reflect high ANI & high ASI populations, respectively – and potential sources of Western Eurasian ancestry.

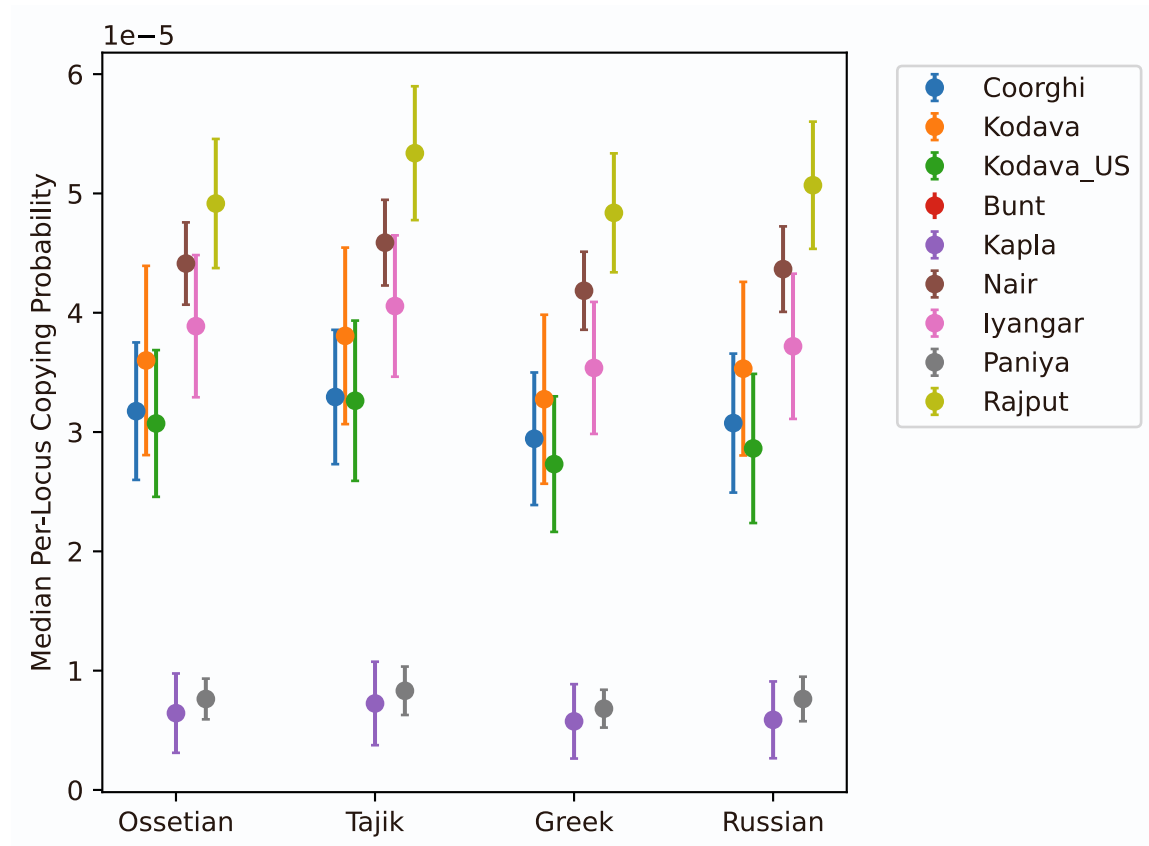

**Figure S17: Total length of ROH (SROH) versus the total number of ROH (NROH).**  
Averaged within populations.

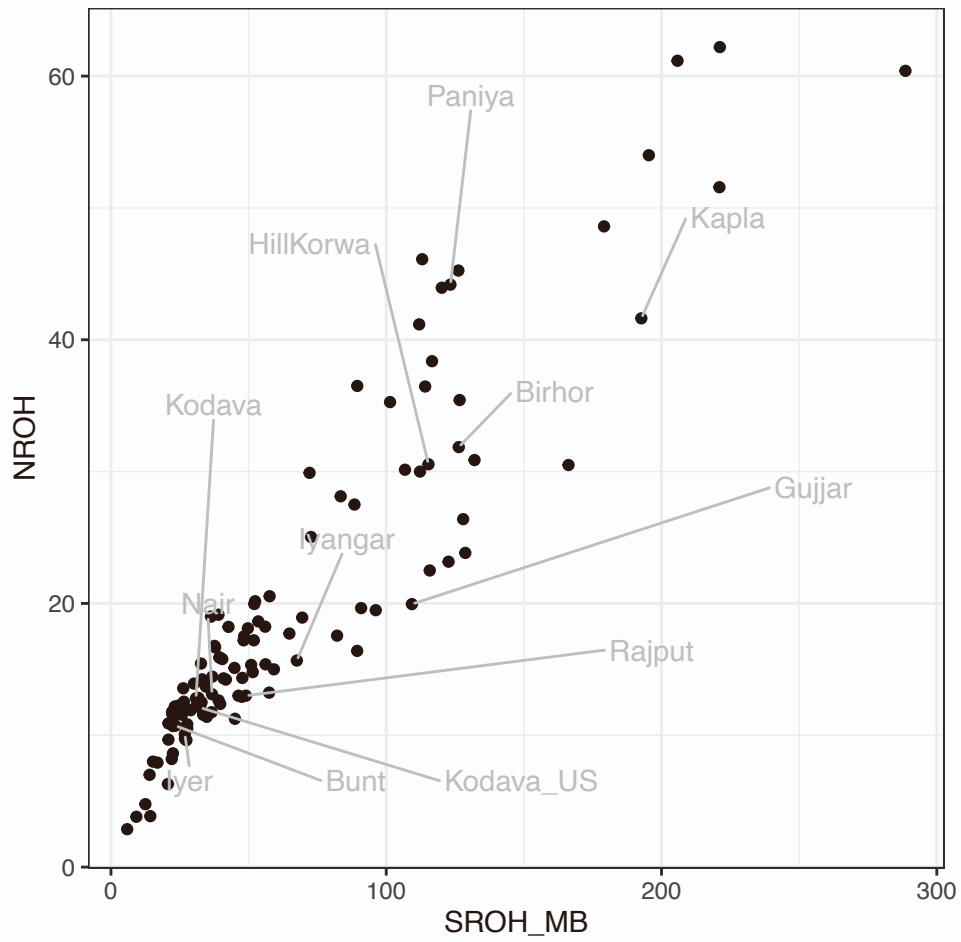

**Figure S18: Short versus long ROH for select populations.** A) Sum of total length of short (2–5Mb) ROH; B) Sum of total length of long (>10Mb) ROH.

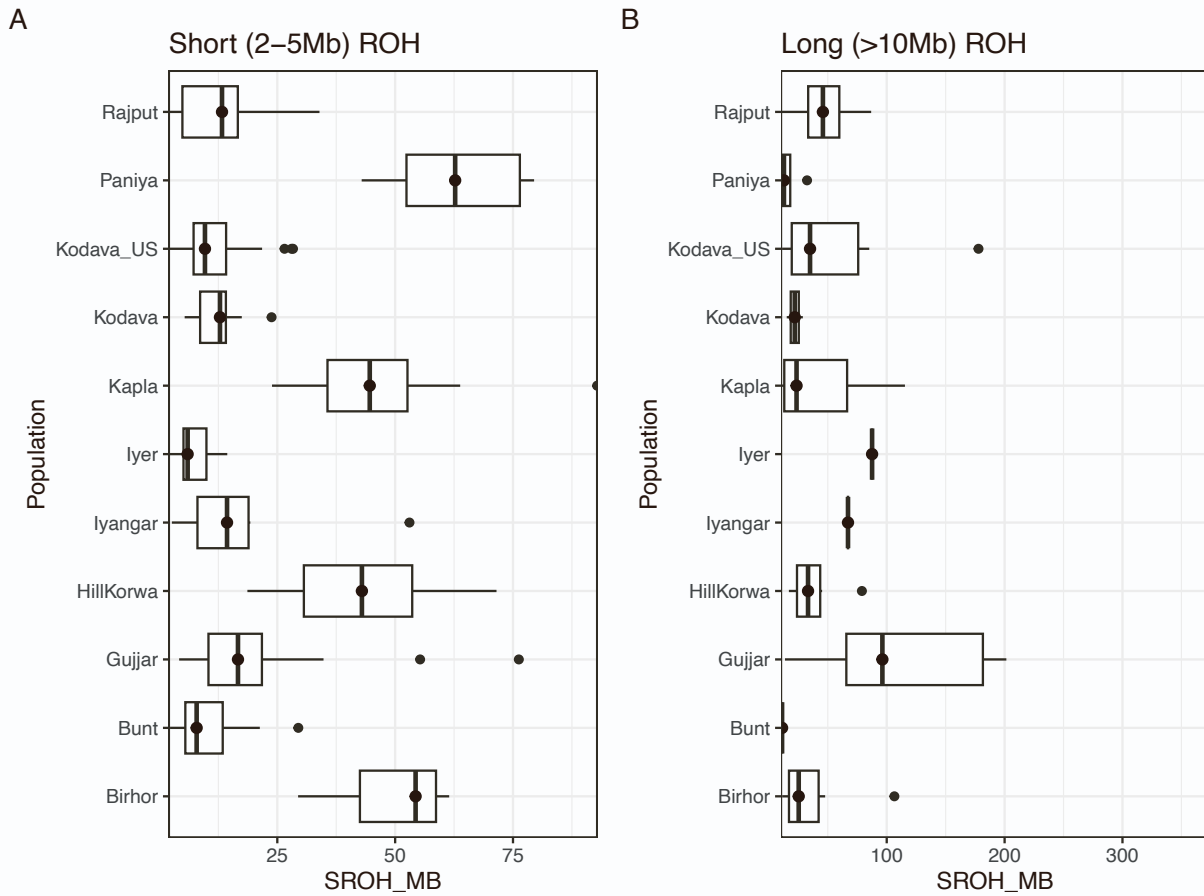

**Figure S19: Decay curves for the Southwest India populations (Kapla, Bunt, Kodava, Kodava US, and Nair) and other South Asian populations. X-axis represents the genetic distance in cM and the Y-axis the allele sharing correlation. The legend for each figure shows the mean and CI for the founder event (Tf) in generations before the present (gBP, 1 generation = 28 years), the intensity of the founder event (If), and the normalized root-mean-square deviation (NRMSD). The algorithm was run using Mbuti as the outgroup population since South Asian populations do not share a recent bottleneck/founder event with this African population. Populations names highlighted in yellow lacked evidence for a significant founder event (see Methods).**

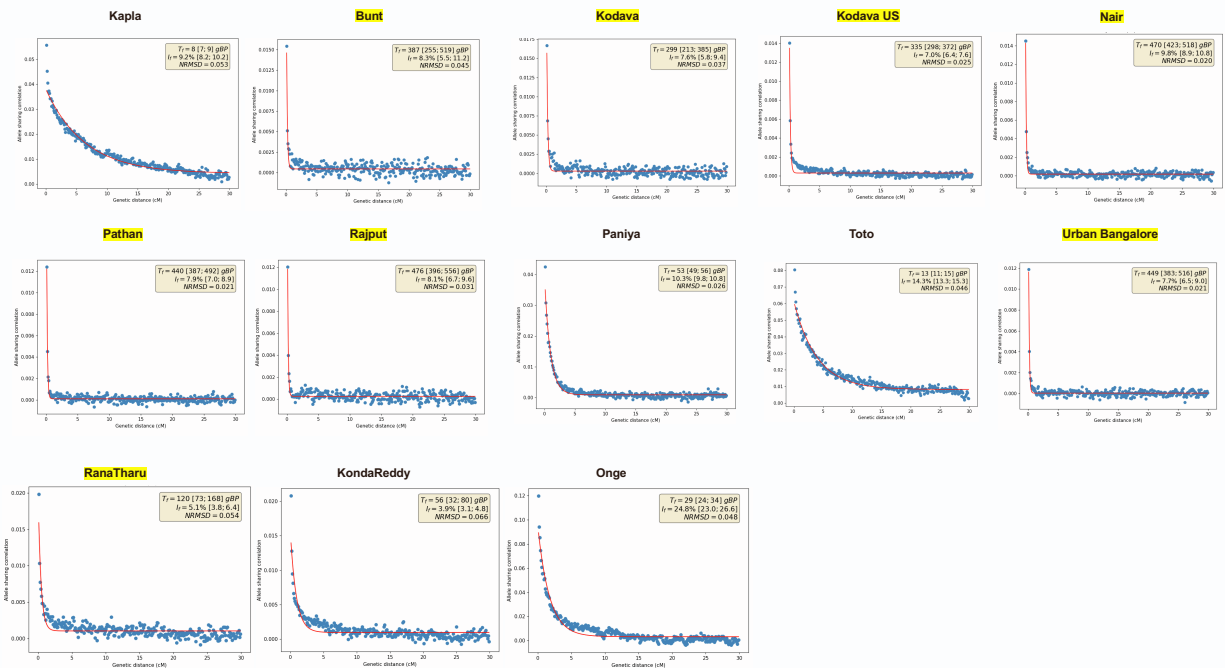



**Figure S20: Functional and novel variation in high-coverage WGS samples from Southwest India.** (A) Estimation of burden of functional mutations across all four study populations using 5000 binomial resampling iterations from carrier frequencies at functional alleles; (B) Estimating fraction of novel mutations per study population using binomial resampling of frequencies.

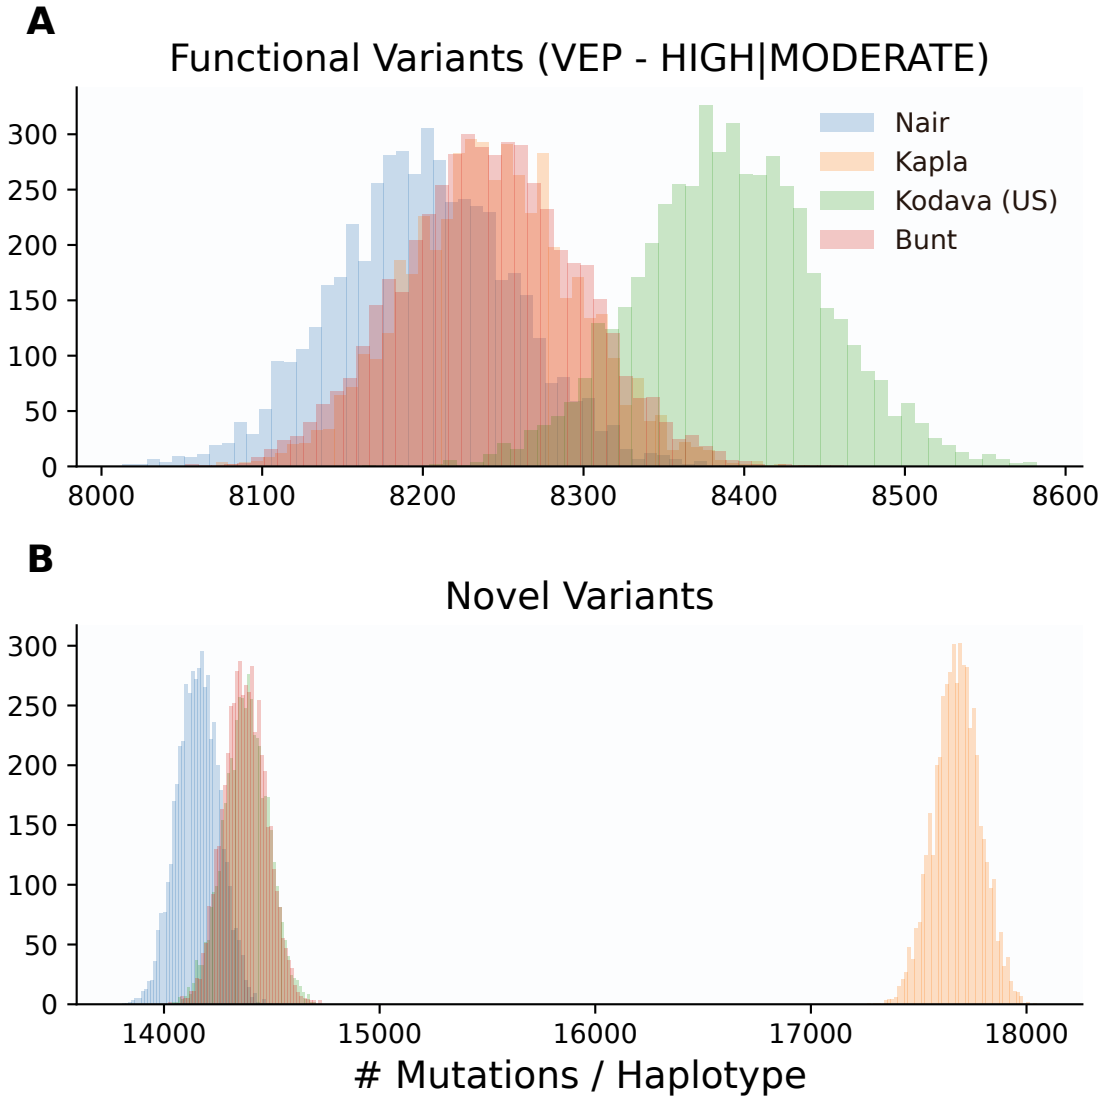

**Table S2: Populations included in Treemix analysis**

| <b>Population Label</b> | <b>Sample size</b> |
|-------------------------|--------------------|
| Assyrian                | 11                 |
| Balochi                 | 21                 |
| Bunt                    | 11                 |
| Coorghi                 | 5                  |
| Dai                     | 10                 |
| Druze                   | 39                 |
| French                  | 27                 |
| Georgian                | 13                 |
| Greek                   | 20                 |
| Gujjar                  | 23                 |
| Iranian                 | 30                 |
| Iyengar                 | 6                  |
| Iyer                    | 13                 |
| Japanese                | 29                 |
| Jew_Cochin              | 5                  |
| Kapla_A                 | 5                  |
| Kapla_B                 | 3                  |
| Khatri                  | 11                 |
| Kodava                  | 15                 |
| Kodava_US               | 78                 |
| Mbuti                   | 10                 |
| Nair                    | 44                 |
| Onge                    | 5                  |
| Palliyar                | 11                 |
| Paniya                  | 11                 |
| Rajput                  | 14                 |
| Central_Steppe_MLBA     | 35                 |
| Sardinian               | 27                 |
| Sikh_Jatt               | 44                 |

**Table S4: Populations used for calculating PCA-based SNP-loadings**

| <b>Population Label</b> | <b>Sample size</b> | <b>Language Family</b> |
|-------------------------|--------------------|------------------------|
| Handigodu               | 6                  | Dravidian              |
| Toda                    | 12                 | Dravidian              |
| Paniya                  | 11                 | Dravidian              |
| Yadav_Pondicherry       | 12                 | Dravidian              |
| Iyengar                 | 6                  | Dravidian              |
| Vysya                   | 39                 | Dravidian              |
| Iyer                    | 13                 | Dravidian              |
| Yerukali                | 6                  | Dravidian              |
| Palliyar                | 11                 | Dravidian              |
| UrbanChennai            | 34                 | Dravidian              |
| STU                     | 8                  | Dravidian              |
| Arunthathiar            | 18                 | Dravidian              |
| <b>Nair</b>             | 44                 | Dravidian              |
| <b>Kodava_US</b>        | 78                 | Dravidian              |
| Ulladan                 | 6                  | Dravidian              |
| UrbanBangalore          | 34                 | Dravidian              |
| <b>Kodava</b>           | 15                 | Dravidian              |
| ITU                     | 25                 | Dravidian              |
| <b>Bunt</b>             | 11                 | Dravidian              |
| Chakkiliyan             | 9                  | Dravidian              |
| Paravar                 | 7                  | Dravidian              |
| Panta_Kapu              | 15                 | Dravidian              |
| <b>Kapla_A</b>          | 5                  | Dravidian              |
| <b>Kapla_B</b>          | 3                  | Dravidian              |
| Adi_Dravider            | 7                  | Dravidian              |
| SourasthraBrahmin       | 9                  | Indo-European          |
| Agarwal                 | 36                 | Indo-European          |
| SaryupariBrahmin        | 13                 | Indo-European          |
| Brahmin_Catholic_Goa    | 14                 | Indo-European          |
| Brahmin_Vaidik          | 25                 | Indo-European          |

|                            |    |               |
|----------------------------|----|---------------|
| Patel                      | 7  | Indo-European |
| Mahar                      | 19 | Indo-European |
| Brahmin_Catholic_Mangalore | 6  | Indo-European |
| Brahmin_Catholic_Kumta     | 10 | Indo-European |
| Sindhi                     | 30 | Indo-European |
| Lambada                    | 11 | Indo-European |
| Brahmin_Tiwari             | 15 | Indo-European |
| WestbengalBrahmin          | 10 | Indo-European |
| Pathan                     | 33 | Indo-European |
| Khatri                     | 14 | Indo-European |
| Gujjar                     | 23 | Indo-European |
| Bhumihar_Bihar             | 7  | Indo-European |
| Rajput                     | 17 | Indo-European |
| Sikh_Jatt                  | 44 | Indo-European |
| Bhil                       | 8  | Indo-European |
| Basque                     | 33 | Indo-European |

**Table S10: Allele sharing of Paniya and Kapla\_A/Kapla\_B/Kapla with ancient and present-day African groups using *D*-statistics. *D*-statistics results for both GATK and pseudo-haploid (PH) versions of Kapla\_A, Kapla\_B, and Kapla have been reported here. These analyses were performed to evaluate patterns of allele sharing between Paniya and Kapla\_A/Kapla\_B/Kapla with groups from Africa. Kapla refers to a pool of Kapla\_A and Kapla\_B individuals.**

| GATK version |         |                              |          |          |       |         |       |       |               |
|--------------|---------|------------------------------|----------|----------|-------|---------|-------|-------|---------------|
| H1           | H2      | H3                           | Outgroup | <i>D</i> | SE    | Z-score | BABA  | ABBA  | Total no snps |
| Paniya       | Kapla_A | Luhya                        | Mbuti    | -0.003   | 0.001 | -2.002  | 20439 | 20547 | 375257        |
| Paniya       | Kapla_A | Yoruba                       | Mbuti    | -0.002   | 0.001 | -1.489  | 20406 | 20479 | 375397        |
| Paniya       | Kapla_A | Ethiopia_4500BP_published.SG | Mbuti    | -0.002   | 0.002 | -0.830  | 20814 | 20898 | 375184        |
| Paniya       | Kapla_A | BantuKenya                   | Mbuti    | -0.002   | 0.001 | -1.852  | 20513 | 20611 | 375397        |
| Paniya       | Kapla_B | Luhya                        | Mbuti    | -0.003   | 0.001 | -1.713  | 20582 | 20688 | 375257        |
| Paniya       | Kapla_B | Yoruba                       | Mbuti    | -0.002   | 0.001 | -1.628  | 20542 | 20635 | 375397        |
| Paniya       | Kapla_B | Ethiopia_4500BP_published.SG | Mbuti    | -0.002   | 0.003 | -0.679  | 20962 | 21041 | 375184        |
| Paniya       | Kapla_B | BantuKenya                   | Mbuti    | -0.002   | 0.001 | -1.480  | 20659 | 20750 | 375397        |
| Paniya       | Kapla   | Luhya                        | Mbuti    | -0.003   | 0.001 | -2.085  | 20488 | 20593 | 375257        |
| Paniya       | Kapla   | Yoruba                       | Mbuti    | -0.002   | 0.001 | -1.712  | 20452 | 20532 | 375397        |
| Paniya       | Kapla   | Ethiopia_4500BP_published.SG | Mbuti    | -0.002   | 0.002 | -0.822  | 20867 | 20944 | 375184        |
| Paniya       | Kapla   | BantuKenya                   | Mbuti    | -0.002   | 0.001 | -1.885  | 20563 | 20658 | 375397        |

| PH version |            |                              |          |          |       |         |       |       |               |
|------------|------------|------------------------------|----------|----------|-------|---------|-------|-------|---------------|
| H1         | H2         | H3                           | Outgroup | <i>D</i> | SE    | Z-score | BABA  | ABBA  | Total no snps |
| Paniya     | Kapla_A_PH | Luhya                        | Mbuti    | -0.002   | 0.001 | -1.237  | 20715 | 20786 | 425476        |
| Paniya     | Kapla_A_PH | Yoruba                       | Mbuti    | -0.001   | 0.001 | -0.893  | 20669 | 20714 | 425476        |
| Paniya     | Kapla_A_PH | Ethiopia_4500BP_published.SG | Mbuti    | 0.001    | 0.002 | 0.262   | 21134 | 21107 | 425394        |
| Paniya     | Kapla_A_PH | BantuKenya                   | Mbuti    | -0.002   | 0.001 | -1.093  | 20781 | 20842 | 425476        |
| Paniya     | Kapla_B_PH | Luhya                        | Mbuti    | -0.002   | 0.002 | -1.002  | 20830 | 20895 | 425476        |
| Paniya     | Kapla_B_PH | Yoruba                       | Mbuti    | -0.002   | 0.001 | -1.091  | 20777 | 20844 | 425476        |
| Paniya     | Kapla_B_PH | Ethiopia_4500BP_published.SG | Mbuti    | -0.001   | 0.003 | -0.365  | 21219 | 21263 | 425394        |
| Paniya     | Kapla_B_PH | BantuKenya                   | Mbuti    | -0.002   | 0.002 | -1.118  | 20889 | 20961 | 425476        |
| Paniya     | Kapla_PH   | Luhya                        | Mbuti    | -0.002   | 0.001 | -1.288  | 20759 | 20828 | 425476        |

|        |          |                                  |       |        |       |        |       |       |        |
|--------|----------|----------------------------------|-------|--------|-------|--------|-------|-------|--------|
| Paniya | Kapla_PH | Yoruba                           | Mbuti | -0.001 | 0.001 | -1.087 | 20712 | 20764 | 425476 |
| Paniya | Kapla_PH | Ethiopia_4500BP<br>_published.SG | Mbuti | 0.000  | 0.002 | -0.037 | 21166 | 21170 | 425394 |
| Paniya | Kapla_PH | BantuKenya                       | Mbuti | -0.002 | 0.001 | -1.241 | 20823 | 20888 | 425476 |

**Table S11: ANI-ASI admixture timings in select populations from India inferred using ALDER (fit started at  $d > 0.30$  cM).** Study populations that were sequenced in this study are highlighted in bold. Admixture times inferred by ALDER are shown both in generations as well as in years (assuming a generation time of 28 years per generation (Narasimhan et al 2019)). Language-family assignments are taken from (Nakatsuka et al. 2017; GenomeAsia100K Consortium 2019). Populations are arranged by decreasing admixture time (generations) within the language family. Asterisks indicate admixture times whose decay rates have a Z-score  $\geq 2$  (corresponding to p-value  $< 0.05$ ).

| Population Label  | Sample size | Language family | Admixture time (generations) | Admixture time SE (generations) | Admixture time (years) | Admixture time SE (years) |
|-------------------|-------------|-----------------|------------------------------|---------------------------------|------------------------|---------------------------|
| Paniya            | 11          | Dravidian       | 195.93*                      | 48.75                           | 5486.04                | 1365.00                   |
| Ulladan           | 6           | Dravidian       | 153.93*                      | 36.30                           | 4310.04                | 1016.40                   |
| Toda              | 12          | Dravidian       | 151.72*                      | 15.89                           | 4248.16                | 444.92                    |
| Vysya             | 39          | Dravidian       | 150.67*                      | 12.06                           | 4218.76                | 337.68                    |
| Arunthatiar       | 18          | Dravidian       | 137.50*                      | 16.17                           | 3850.00                | 452.76                    |
| Palliyar          | 11          | Dravidian       | 132.11*                      | 27.54                           | 3699.08                | 771.12                    |
| Iyengar           | 6           | Dravidian       | 130.93*                      | 22.45                           | 3666.04                | 628.60                    |
| Adi_Dravider      | 7           | Dravidian       | 128.96*                      | 18.90                           | 3610.88                | 529.20                    |
| Chakkiliyan       | 9           | Dravidian       | 119.54*                      | 27.04                           | 3347.12                | 757.12                    |
| Yadav_Pondicherry | 12          | Dravidian       | 114.18*                      | 20.32                           | 3197.04                | 568.96                    |
| <b>Kodava_US</b>  | 78          | Dravidian       | 110.93*                      | 9.23                            | 3106.04                | 258.44                    |
| Iyer              | 13          | Dravidian       | 110.25*                      | 9.28                            | 3087.00                | 259.84                    |
| Panta_Kapu        | 15          | Dravidian       | 109.28*                      | 20.01                           | 3059.84                | 560.28                    |
| ITU               | 25          | Dravidian       | 108.32*                      | 9.61                            | 3032.96                | 269.08                    |
| <b>Bunt</b>       | 11          | Dravidian       | 106.29*                      | 8.65                            | 2976.12                | 242.20                    |
| Paravar           | 7           | Dravidian       | 103.74*                      | 15.08                           | 2904.72                | 422.24                    |
| <b>Nair</b>       | 44          | Dravidian       | 101.15*                      | 9.99                            | 2832.20                | 279.72                    |
| STU               | 8           | Dravidian       | 98.39*                       | 22.93                           | 2754.92                | 642.04                    |
| Yerukali          | 6           | Dravidian       | 98.01*                       | 21.14                           | 2744.28                | 591.92                    |
| Handigodu         | 6           | Dravidian       | 95.41*                       | 16.41                           | 2671.48                | 459.48                    |
| UrbanBangalore    | 34          | Dravidian       | 94.44*                       | 6.05                            | 2644.32                | 169.40                    |
| <b>Kodava</b>     | 15          | Dravidian       | 94.28*                       | 6.27                            | 2639.84                | 175.56                    |
| UrbanChennai      | 34          | Dravidian       | 91.90*                       | 6.74                            | 2573.20                | 188.72                    |
| <b>Kapla_A</b>    | 5           | Dravidian       | 21.46                        | 269.40                          | 600.88                 | 7543.20                   |
| <b>Kapla_B</b>    | 3           | Dravidian       | 5.03*                        | 1.99                            | 140.84                 | 55.72                     |

|                                |    |               |         |       |         |        |
|--------------------------------|----|---------------|---------|-------|---------|--------|
| Mahar                          | 19 | Indo-European | 117.27* | 13.70 | 3283.56 | 383.60 |
| Khatri                         | 14 | Indo-European | 114.22* | 17.60 | 3198.16 | 492.80 |
| SaryupariBrahmin               | 13 | Indo-European | 111.94* | 9.73  | 3134.32 | 272.44 |
| SourasthraBrahmin              | 9  | Indo-European | 111.10* | 14.13 | 3110.80 | 395.64 |
| Agarwal                        | 36 | Indo-European | 110.25* | 6.59  | 3087.00 | 184.52 |
| Brahmin_Tiwari                 | 15 | Indo-European | 107.94* | 11.05 | 3022.32 | 309.40 |
| WestbengalBrahmin              | 10 | Indo-European | 106.25* | 9.71  | 2975.00 | 271.88 |
| Brahmin_Vaidik                 | 25 | Indo-European | 106.20* | 7.32  | 2973.60 | 204.96 |
| Brahmin_Catholic_M<br>angalore | 6  | Indo-European | 102.37* | 15.31 | 2866.36 | 428.68 |
| Brahmin_Catholic_K<br>umta     | 10 | Indo-European | 101.19* | 14.38 | 2833.32 | 402.64 |
| Patel                          | 7  | Indo-European | 96.22*  | 18.89 | 2694.16 | 528.92 |
| Brahmin_Catholic_G<br>oa       | 14 | Indo-European | 94.55*  | 9.79  | 2647.40 | 274.12 |
| Gujjar                         | 23 | Indo-European | 93.56*  | 7.49  | 2619.68 | 209.72 |
| Sindhi                         | 30 | Indo-European | 92.01*  | 6.29  | 2576.28 | 176.12 |
| Rajput                         | 17 | Indo-European | 89.79*  | 12.70 | 2514.12 | 355.60 |
| Lambada                        | 11 | Indo-European | 86.65*  | 16.62 | 2426.20 | 465.36 |
| Bhumihar_Bihar                 | 7  | Indo-European | 82.90*  | 13.07 | 2321.20 | 365.96 |
| Pathan                         | 33 | Indo-European | 66.99*  | 9.16  | 1875.72 | 256.48 |
| Bhil                           | 8  | Indo-European | 65.30*  | 10.13 | 1828.40 | 283.64 |
| Sikh_Jatt                      | 44 | Indo-European | 59.86*  | 5.78  | 1676.08 | 161.84 |



**Table S15: Haplotype and nucleotide diversity on mtDNA across matrilineal and patrilineal groups in Southwest India.** For each study population with available mitogenome data, we computed the number of unique haplotypes (h) and haplotype diversity and its standard error based on 100 bootstrap resampling iterations (HD, HD\_SD) and the overall nucleotide diversity as a per-basepair rate (pi) using the software pixy (Korunes & Samuk 2021). See Methods for further details on calculations.

| <b>Population</b> | <b>N</b> | <b>h</b> | <b>HD</b> | <b>HD_SD</b> | <b>pi</b> |
|-------------------|----------|----------|-----------|--------------|-----------|
| Bunt              | 11       | 6        | 0.836     | 0.045        | 0.006     |
| Kapla             | 6        | 3        | 0.733     | 0.080        | 0.003     |
| Kodava            | 15       | 8        | 0.924     | 0.049        | 0.003     |
| Kodava_US         | 105      | 62       | 0.987     | 0.003        | 0.001     |
| Nair              | 44       | 38       | 0.978     | 0.012        | 0.003     |
